# Supplementary material for: HIV-1 Diversity, Transmission Dynamics and Primary Drug Resistance in Angola
Source: PLoS One. 2014 Dec 5;9(12):e113626. doi: 10.1371/journal.pone.0113626 (PMC4257534; doi:10.1371/journal.pone.0113626)
Supplement: Table S2 — Drug resistance mutations and natural polymorphisms detected in the RT of drug-naive patients from Luanda. (XLS) [file pone.0113626.s002.xls]

## Sheet: Table S2
Table S2 - Drug resistance mutations and natural polymorphisms detected in the RT of drug-naive patients from Luanda.
Codons	Patients (%)
	Angola											World						P value (Angola vs World)#+
	A	A3	C	D	F1	G	AG	A	CRF05_DF	cpx_09	U	BW	C	D	F	G	AG	A	C	D	F	G	AG
	(n = 28 )	(n = 1 )	(n = 26 )	(n = 9)	(n = 14)	(n = 7)	(n = 11)	(n = 3108)	(n = 1)	(n = 2)	(n = 4)	(n =5539)	(n = 6794)	(n = 1095)	(n = 413)	(n = 1197)	(n = 2269)
M41L	-	-	-	-	-	11.1	-	-	-	-	-	0.3	-	-	-	0	-	-	-	-	-	0.0221	-
D67N	-	-	-	-	-	11.1	-	-	-	-	-	0	-	-	-	0	-	-	-	-	-	0.0222	-
K103N	-	-	5	-	-	-	-	-	-	-	-	0.3	0.3	-	-	-	-	-	0.0681	-	-	-	-
V179F	-	-	-	-	-	-	16.7	-	-	-	-	0	-	-	-	-	-	-	-	-	-	-	-
M184V	-	-	-	-	-	11.1	-	-	-	-	-	0.2	-	-	-	0	-	-	-	-	-	0.0221	-
T215F	-	-	5	-	-	-	-	-	-	-	-	0	0	-	-	-	-	-	0.0100	-	-	-	-
T215Y	-	-	-	-	-	11.1	-	-	-	-	-	0	-	-	-	0	-	-	-	-	-	0.0221	-
L210W	-	-	-	-	-	11.1	-	-	-	-	-	0	-	-	-	0	-	-	-	-	-	0.0221	-
Y318F	-	-	-	-	-	-	-	6.7	-	-	-	0	-	-	-	-	0	-	-	-	-	-	0.0144
K103N	-	-	-	-	-	1	-	-	-	-	-	-	-	-	-	0	-	-	-	-	-	<0.0001	-
P4S	-		2	-	-	-	-	-					272	-	-	-	-	-	0.6486	-		-	-
P4T	-		1	-	-	1	-	-					0	-	-	0	-	-	<0.0001	-	0.0058	-	-
P4QK	-		-	-	1	-	-	-					-	-	0	-	-	-	-	-	0.0328	-	-
I5V	2		-	-	1	-	-	59					-	-	0	-	-	0.1891	-	-	0.0328	-	-
E6D			-	1	1	-	-	-					-	19	31	-	-	-	-	0.1366	1	-	-
E6K	1		1	-	-	-	1	106					150	-	-	-	30	0.634	0.8065	-	-	-	0.3604
E6N	1	-	-	-	-	-	-	53					-	-	-	-	-	0.9792		-	-	-	-
K11D	-		1	-	-	-	-	-					0	-	-	-	-	-	<0.0001	-	-	-	-
K11Q	-		-	-	-	1	-	-					-	-	-	12	-	-	-	-	-	0.0734
K11R	-		-	-	-	-	1	-					-	-	-	-	0	-	-	-	-	-	<0.0001
K11S	4		-	-	-	-	-	0					-	-	-	-	-	<0.0001	-	-	-	-	-
K11T	5		1	-	-	-	-	1274					0	-	-	-	-	0.0222	<0.0001	-	-	-	-
K20R	4		1	3	5	1	1	591					462	76	50	168	132	0.694	0.836	0.0152	0.0238	1	0.855
V21A	1		-	-	-	-	-	0				-	-	-	-	-	-	<0.0001	-	-	-	-	-
V21I	-		-	-	1	4	-	-	-	-	-	-	-	-	5	65	-		-	-	0.1823	0.0003	-
T27S	1		2	-	-	1	-	31					197	-		0	-	0.6857	0.4144	-	-	0.0058	-
V35K	-		4	-	2	-	-	-					211	-	10	-	-	-	0.0026	-	0.0546	-	-
V35I	-		-	1	1	-	-	-						59	1	-	-	-	-	0.3617	0.0674	-	-
V35T	28		22	7	11	7	11	2890					6318	986	347	1125	2042	0.2803	0.1995	0.5697	0.4815	-	-
E36A	1		22	-	-	-	-	93					4824	-	-	-	-	0.7056	0.1899	-	-	1	0.548
E36V	1		-	-	-	-	-	0				-	-	-	-	-	-	<0.0001	-	-	-	-	-
T39A	1		-	2	1	2	5	162				-	-	80	83	60	60	0.9695	-	0.1141	0.3208	0.0464	<0.0001
T39D	1		3	-	-	-	-	0					1495	-	-	-	-	<0.0001	0.0004	-	-	-	-
T39E	-		22	-	-	-	-	-					4756	-	-	-	-	-	0.1588	-	-	-	-
T39K	9	-	-	-	2	1	-	870				-	-	-	16	83	-	0.7829	-	-	0.1131	0.398	-
T39L	1	-	-	3	3	1	-	47				-	-	22	28	49	-	0.9121	-	0.0005	0.073	0.2574	-
T39M	3		-	-	-	-	-	112				-	-	-	-	-	-	0.1368	-	-	-	-	-
T39N	4		-	-	-	-	-	177				-	-	-	-	-	-	0.1521	-	-	-	-	-
T39P	-		-	-	-	1	-	-				-	-	-	0	-	-	-	-	-	0.0058	-	-
T39R	-		-	-	1	-	-	-				-	-	-	7	-	-	-	-	-	0.2358	-	-
T39S	1		-	-	1	-	-	34				-	-	-	5	-	-	0.7348	-	-	0.1823	-	-
E40A	1		-	-	-	-	-	0				-	-	-	-	-	-	<0.0001	-	-	-	-	-
E40D	7		4	5	1	4	5	373					482	285	83	239	227	0.0707	0.084	0.0332	0.3208	0.034	<0.0001
K43E	3		-	-	1	-	-	183				-	-	-	0	-	-	0.5	-	-	0.035	-	-
K43Q	-		-	-	-	1	-	-	-	-	-	-	-	-	-	0	-	-	-	-	-	0.0058	-
K43R	-		1	-	-	2	-	-					50	-	-	204	-	-	0.4858	-	-	0.3427	-
S48T	1		24	-	-	-	-	78					5911	-	-	-	-	0.8035	0.6094	-	-	-	-
K49R	4	-	-	7	2	1	-	342					-	722	79	132	-	0.8035	-	0.278	1	0.5603	-
K64R	5	-	-	-	-	-	-	0				-	-	-	-	-	-	<0.0001	-	-	-	-	-
V69I	11		5	8	1	6	3	1492					2718	1051	74	922	771	0.4657	0.1313	1	0.4803	1	0.8812
S68G	-	-	-	-	-	1	2	-	-	-	-	-	-	-	-	24	79	-	-	-	-	0.1369	0.0701
S68R	1	-	-	-	-	-	-	0				-	-	-	-	-	-	<0.0001	-	-	-	-	-
A98S	-	-	-	-	-	4	-	-				-	-	-	-	407	-	-	-	-	-	0.2385	-
K102Q	3	-	-	-	-	-	-	53				-	-	-	-	-	-	0.0041	-	-	-	-	-
K103R	-		1	-	-	-	-	-	-	-	-		0	-	-	-	-	-	<0.0001	-	-	-	-
K104R	1		1	-	2	-	2	0					197	-	10	-	129	<0.0001	0.7655	-	0.0546	-	0.3387
K104T	-		1	-	-	-	-	-					0	-	-	-	-		<0.0001	-	-	-	-
V118I	32		1	-	1	-	-	56					170	-	13	-	-	<0.0001	0.0024	-	0.3776	-	-
V118M	-		-	1	-	-	-	-					-	0	-	-	-	-	-	0.0073	-	-	-
D121C	-		-	2	-	-	-	-					-	48	-	-	-	-	0.8175	0.0473	-	-	-
D121H	4		1	1	-	1	-	373					285	107	-	65	-	0.9377	0.688	0.5627	-	0.3268	-
D121Y	-		3	3	-	-	-	-					815	372	-	-	-	-	0.8175	1	-	-	-
K122A	1	-	-	-	-	-	-	0				-	-	-	-	-	-	<0.0001	-	-	-	-	-
K122E	25		20	7	3	5	3	2797					6115	898	66	778	817	0.8478	0.059	1	0.4815	1	0.7739
K122V	-		1	-	-	-	-	-					0	-	-	-	-	-	<0.0001	-	-	-
D123E	-		4	-	-		1						251		223		386		0.0143	-	-	-	0.7676
D123G	-		3	-	-	1	1	-					1427	-	-	40	75	-	0.2703	-	-	0.2158	0.8224
D123N	11		3	-	1	1	-	777					951	-	0	132	-	0.1295	0.9382	-	0.0328	0.5603	-
D123S	7		5	-	-	3	1	1461					1563	-	-	443	123	0.0329	0.6737	-	-	0.7144	0.8958
I135K	-		1	-	-	-	-	-	-	-	-		0	-	-	-	-	-	<0.0001	-	-	-	-
I135L	-		-	-	1	-	-	-	-	-	-	-	-	-	95	-	-	-	-	-	0.208	-	-
I135R	-		-	1	-	-	-	-	-	-	-	-	-	26	-	-	-	-	-	0.1804	-	-	-
I135T	8		-	1	2	1		1492				-	-	252	40	323	-	0.063	-	0.6903	0.6378	0.6818	-
I135V	-		5	1	9	3	5	-					435	3	120	335	1498	-	0.024	0.0287	0.0137	0.4083	0.2641
I135Y	-		1	-	-	-	-	-	-	-	-		0	-	-	-	-	-	<0.0001	-	-	-	-
E138A	-		2	-	-	-	-	-	-	-	-		387	-	-	-	-	-	0.9371	-	-	-	-
E138D	1		-	-	-	-	-	0					-	-	-	-	-	<0.0001		-	-	-	-
E138V	-		1	-	-	-	-	-	-	-	-		0	-	-	-	-	-	<0.0001	-	-	-	-
I142T	-		1	-	-	-	-	-	-	-	-		37	-	-	-	-	-	0.2453	-	-	-	-
I142V	5		5	1	-	-	-	404					285	105	-	-	-	0.6326	0.0019	0.5556	-	-	-
K154R	1		1	-	-	-	-	0					0	-	-	-	-	<0.0001	<0.0001	-	-	-	-
P157L	-		1	-	-	-	-	-	-	-	-		0	-	-	-	-	-	<0.0001	-	-	-	-
P157R	-		-	-	2	-	-	-	-	-	-		-	-	0	-	-	-	-	-	0.001	-	-
A158S	5		4	1	-	-	-	496					747	12	-	-	-	0.9889	0.6893	0.0908	-	-	-
S162A	1		-	-	-	1	9	137					-	-	-	395	2133	0.8042	-	-	-	0.4368	0.2904
S162C	1		7	1	11	2	-	177					747	0	219	49	-	0.9416	0.0397	0.0073	0.0988	0.0322	-
S162E	-	-	-	-	-	-	1	-	-	-	-	-	-	-	-	-	0	-	-	-	-	-	<0.0001
S162N	1	-	-	-	-	-	-	0				-	-	-	-	-	-	<0.0001	-	-	-	-	-
S162T	-		-	-	-	-	1	-	-	-	-	-	-	-	-	-	0	-	-	-	-	-	<0.0001
S162W	-		-	-	1	-	-	-	-	-	-	-	-	-	5	-	-	-	-	-	0.1823	-	-
T165I	1		3	2	-	1	-	146					414	81	-	47	-	0.8663	0.4554	0.1165	-	0.2484	-
T165P	-		1	-	-	-	-	-					0	-	-	-	-	-	<0.0001	-	-	-	-
K166R	2		3	1	-	-	-	81					951	22		-	-	0.3694	0.9382	0.1556	-	-	-
E169D	1		-	2	2	-	1	109					-	120	153	-	27	0.6188	-	0.2186	0.7159	-	0.3166
E169G	1		-	-	-	-	-	0					-	-		-	-	<0.0001	-	-	-	-	-
K173A	15		14	-	2	2	-	435					4212	-	215	168	-	<0.0001	0.2671	-	0.0058	0.2587	-
K173D	-		-	-	1	-	-	-					-	-	0	-	-	-	-	-	0.0328	-	-
K173I	-		-	-	7	-	3	-					-	-	35	-	193	-	-	-	0.0001	-	0.0937
K173L	3		-	-	1	-	-	839					-	-	0	-	-	0.0852	-	-	0.0328	-	-
K173M	-		-	-	1	-	-	-					-	-	0	-	-	-	-	-	0.0328	-	-
K173N	-		-	-	-	-	1	-					-	-	-	-	0	-	-	-	-	-	<0.0001
K173R	-		1	-	1	1	-	-					0	-	7	65	-		<0.0001	-	0.2358	0.3268	-
K173S	4		-	-	-	-	1	1554					-	-	-	-	43	0.0004	-	-	-	-	0.5273
K173T	1		10	-	-	3	3	96					1699	-	-	515	1520	0.6881	0.1759	-	-	1	0.3303
Q174H	1							0										<0.0001		-			-
Q174K	14		11	-	14	5	-	2300					2174	-	372	910	-	0.0078	0.5341	-	0.3797	0.6760	-
Q174N	-		1	1	-	-	-	-					11	0	-	-	-	-	0.0332	0.0073	-	-	-
Q174R	-		1	1	-	1	7	-					401	11	-	63	1566	-	0.9783	0.0840	-	0.3184	0.2381
D177E	21		20	7	4	5	7	2642					5299	996	149	1101	2133	0.2272	0.9160	0.5337	0.7782	0.1052	0.0004
D177G	2		-	-	-	-	-	87				-	-	-	-	-	-	1	-	-	-	-	-
D177N	-	-	-	-	1	-	-	-	-	-	-	-	-	-	10	-	-	-	-	-	0.3101	-	-
I178L	3		2	3	3	-	-	106					482	131	50	-	-	0.1136	0.7917	0.0620	0.3973	-	-
I178M	3		-	2	1	-	3	174					-	471	19	-	635	0.4494	-	0.4779	0.4945	-	0.7764
I178V	-		3	-	-	-	-	-					115	-	-	-	-	-	0.0020	-	-	-	-
V179D	-		2		1	-	-	-					0	-	1	-	-	-	<0.0001	-	0.1823	-	-
V179G	-		-	-	1	-	-	-					-	-	5	-	-	-	-	-	0.1823	-	-
V179I	1		-	-	1	-	-	1678					-	-	20	-	-	<0.0001	-	-	0.1585	-	-
G196E	8		2	1	-	2	-	193					299	39	-	71	-	<0.0001	0.7360	0.2566	-	0.0625	-
G196K	-		1	-	-	-	-	-					122	-	-	-	-	-	0.9634	-	-	-	-
G196S	1	-	-	-	-	-	-	27					-	-	-	-	-	<0.0001	-	-	-	-	-
T200A	19		26	-	14	7	7	1150					6250	-	182	1101	2065	0.0015	0.2537	-	-	1	0.0088
T200E	-	-	-	5	-	-	-	-					-	164	-	-	-	-	-	0.0030	-	-	-
T200I	2	-	-	-	-	-	-	118					-	-	-	-	-	0.6715	-	-	-	-	-
T200M	-	-	-	1	-	-	-	-					-	34	-	-	-	-	-	0.2280	-	-	-
T200P	1			-	-	-	-	0					-	-	-	-	-	<0.0001	-	-	-	-	-
T200R	1	-	-	-	-	-	-	0					-	-	-	-	-	<0.0001	-	-	-	-	-
T200V	-	-	-	-	-	-	4	-					-	-	-	-	0	-	-	-	-	-	<0.0001
I202V	2		2	-	2	-	-	622					510	-	26	-	-	0.1442	0.7361	-	0.2320	-	-
E204D	1		1	1	-	-	-	0					0	0	-	-	-	<0.0001	<0.0001	0.0073	-	-	-
E204K	-		-	1	-	-	1	-					-	81	-	-	52	-	-	0.4621	-	-	0.6241
E204L	-	-	-	1	-	-	-	-	-	-	-	-	-	0	-	-	-	-	-	0.0073	-	-	-
E204Q	1	-	-	2	-	-	-	0				-	-	0	-	-	-	<0.0001	-	<0.0001	-	-	-
Q207A	18		5	-	-	1	3	2704					584	-	-	55	172	0.0011	0.1148	-	-	0.2841	0.0601
Q207D	4		2	-	1	-	-	87					428	-	30	-	-	0.0024	0.9103	-	1	-	-
Q207E	1		17	7	11	1	7	180					4552	756	223	515	1679	0.9247	0.9728	0.4470	0.0998	0.2495	-
Q207G	-	-	-	-	-	-	1	-	-	-	-	-	-	-	-	-	95	-	-	-	-	-	0.9558
Q207K	-	-	-	-	-	3	-	-	-	-	-	-	-	-	-	359	-	-	-	-	-	0.4354	-
Q207N	2		1		1			44					211	-	16	-	-	0.0854	0.7271	-	0.4389	-	-
Q207S	-		1	-	-	-	-	-	-	-	-		0	-	-	-	-	-	<0.0001	-	-	-	-
R211A	-	-	-	-	1	-	-	-	-	-	-	-	-	-	12	-	-	-	-	-	0.3558	-	-
R211K	15		14	6	7	1	9	466					4484	879	314	443	1203	<0.0001	0.2722	0.6609	0.0516	0.4338	0.1081
R211N	-	-	-	-	-	1	1	-				-	-	-	-	37	23	-	-	-	-	0.2015	0.2552
R211S	10	-	-	-	1	5	-	2238				-	-	-	5	383	-	<0.0001	-	-	0.1823	0.0388	-
F214L	6		5	3	-	1	-	404					883	38	-	144	-	0.3003	0.5152	0.0129	-	0.5937	-
P243A	2		2	1	1	-	-	0					0	14	66	-	-	<0.0001	<0.0001	0.1041	0.7067	-	-
P243S	-		1	1	1	-	-	-					0	35	0	-	-	-	<0.0001	0.2338	0.0328	-	-
P243T	1		3		1	-	-	0					163	-	10	-	-	<0.0001	0.0173	-	0.3101	-	-
I244V	-		-	5	-	-	-	-						44	-	-	-		-	<0.0001	-	-	-
V245E	7		1	1	-	-	-	528					211	164	-	-	-	0.3845	0.7271	1	-	-	-
V245H	-	-	-	-	1	-	-	-	-	-	-	-	-	-	0	-	-	-	-	-	<0.0001	-	-
V245K	1		2	4	1	-	1	292					482	482	5	-	168	0.4666	0.7971	0.7368	0.1823	-	0.7160
V245L	1		-	-	-	-	-	0				-	-	-	-	-	-	<0.0001	-	-	-	-	-
V245M	3		-	-	-	-	-	466				-	-	-	-	-	-	0.7144	-	-	-	-	-
V245Q	13		21	1	11	17	10	1243					5571	175	380	1065	1072	0.6184	0.9260	1	0.1050	0.3887	0.0096
V245S	-	-	-	-	1	-	-	-	-	-	-	-	-	-	0	-	-	-	-	-	<0.0001	-	-
V245T	1		-	1	-	-	-	402				-	-	153	-	-	-	0.0015	-	1	-	-	-
E248D	10		8	-	7	4	4	995					679	-	244	814	386	0.8303	0.0014	-	0.5844	0.6867	0.1939
E248N	2	-	-	-	4	-	-	205				-	-	-	58	-	-	0.7901	-	-	0.1306	-	-
D250K		-	-	-	-							-	-	-	-	-	-		-	-	-	-	-
D250T	1	-	-	-	-	-	-	0				-	-	-	-	-	-	<0.0001	-	-	-	-	-
S251A	1	-	-	-	-	-	-	0				-	-	-	-	-	-	<0.0001	-	-	-	-	-
S251D	-		1	-	-	1	4	-	-	-	-		14	-	-	36	0	-	0.0763	-	-	0.1967	<0.0001
S251H	3	-	-	-	-	-	-	40				-	-	-	-	-	-	0.0006		-	-	-	-
S251N	1		1	-	1	-	-	71					88	-	7	-	-	0.8365	0.8221	-	0.2358	-	-
S251T	1		-	-	-	-	-	0					-	-	-	-	-	<0.0001		-	-	-	-
K275Q	3		1	-	1	2		121					279	-	4	77	-	0.1748	0.6684	-	0.1542	0.1263	-
K275R	1		2	-	1	2	1	53					394	-	78	0	116	0.9792	0.9935	-	0.4825	<0.0001	0.9296
A272K	-		2	-	-	-	-	-	-	-	-		82	-	-	-	-	-	0.0356	-	-	-	-
A272P	11		18	7	11	6	-	1108					5435	788	392	1053	-	0.8402	0.2613	0.4550	0.0378	0.5937	-
A272S	6		1		2	1		106					214	-	10	57	-	<0.0001	0.7193	-	0.0546	0.2928	-
A272T	-	-	-	-	-	-	1	-	-	-	-	-	-	-	-	-	0	-	-	-	-	-	<0.0001
V276I	-		1	1	-	1	2	-	-	-	-		88	49	-	62	170	-	0.7808	0.3109	-	0.3142	0.4431
V276T	-	-	-	-	1	-	-	-	-	-	-	-	-	-	0	-	-	-	-	-	0.0328	-	-
K277Q	-	-	-	-	1	-	-	-	-	-	-	-	-	-	0	-	-	-	-	-	0.0328	-	-
K277R	8		12	6	3	1	-	528					4076	624	120	227	-	0.1711	0.2161	0.4779	0.7656	1	-
K277S	-		-	-	-	1	1	-					-	-	-	0	408	-	-	-	-	0.0058	0.7093
Q278H	-		2	3	1	3	-	-					299	64	66	91	-	-	0.7360	0.0096	0.7067	0.0128	-
Q278N	-		1	-	1	-	-	-					183		6	-	-	-	0.8070	-	0.2095	-	-
K281R	6		4	1	4	2	1	653					598	105	27	109	522	0.8580	0.4039	0.5556	0.0137	0.1302	0.4620
L283I	3		2	-	-	-	-	127					197	-	-	-	-	0.2022	0.3868	-	-	-	-
R284K	-		1	-	-	-	4	-					95	-	-	-	34	-	0.8231	-	-	-	<0.0001
T286A	18		20	6	13	7	11	2673					4416	712	355	1053	2156	0.0026	0.2861	0.7206	0.7033	1	0.9498
T286V	-		1	-	-	-	-	-					183	-	-	-	-	-	0.8070	-	-	-	-
E291D	23		24	-	11	6	11	2766					6386	-	384	1089	2019	0.3963	0.9584	-	0.079	0.4862	0.4946
E291I	-	-	-	-	1	-	-	-					-	-	0	-	-	-	-	-	0.0328	-	-
V292I	20		23	1	13	7	6	1958					6318	110	326	1137	1883	0.4694	-	0.5732	0.3182	1	0.0361
I293V	27		20	6	13	7	10	3046					6386	843	405	1149	2224	0.9326	0.0013	1	0.2613	1	0.5500
P194A	1	-	-	-	-	-	-	127				-	-	-	-	-	-	0.7319	-	-	-	-	-
P294S	-	-	-	-	1	-	-	-				-	-	-	7	-	-	-	-	-	0.1434	-	-
P294T	16		2	1	-	2	9	2020					347	41	-	68	1566	0.5043	0.8799	0.2677	-	0.0579	0.5556
L295M	2		-	-	-	-	-	106					-	-	-	-	-	0.5771	-	-	-	-	-
L295W	1		-	-	-	-	-	0					-	-	-	-	-	<0.0001	-	-	-	-	-
E297A	1		-	-	1	5	-	0					-	-	0	802	-	<0.0001	-	-	0.0328	-	-
E297D	2		-	-	-	-	-	0					-	-	-	-	-	<0.0001	-	-	-	-	-
E297K	4		2	6	-	-	-	199					102	142	-	-	-	0.1929	0.0768	0.0001	-	-	-
E297R	2		-	-	8	-	-	53					-	-	244	-	-	0.1445	-	-	1	-	-
E297T	-		-	-	3	1	-	-					-	-	95	103	-	-	-	-	1	0.4695	-
L310I	-		1	-	1	-	4	-					82	-	5	-	41	-	0.7422	-	0.1823	-	<0.0001
K311R	3		1	-	-	-	-	118					401	-	-	-	-	0.1617	0.9783	-	-	-	-
E312D	8		-	-	-	-	-	1865					-	-	-	-	-	0.0015	-	-	-	-	-
E312N	1		-	-	-	-	-	342					-	-	-	-	-	0.3419	-	-	-	-	-
E312P	1		-	-	-	-	-	0					-	-	-	-	-	<0.0001	-	-	-	-	-
E312Q	1		-	-	-	-	-	0					-	-	-	-	-	<0.0001	-	-	-	-	-
E312T	3		-	-	-	-	-	37					-	-	-	-	-	0.0003	-	-	-	-	-
V317A	3		5	-	1	-	-	246					747	-	58	-	-	0.8459	0.3056		0.7033	-	-
V317E	-		1	-	-	-	-	-	-	-	-		0	-	-	-	-	-	<0.0001	-	-	-	-
S322A	1	-	-	-	-	-	7	106				-	-	-	-	-	163	0.6340	-	-	-	-	<0.0001
S322E	1	-	-	-	-	-	-	0				-	-	-	-	-	-	<0.0001	-	-	-	-	-
S322T	-	-	-	-	-	-	1	-				-	-	-	-	-	102	-	-	-	-	-	0.9964
K323E	1	-	-	-	-	-	-	0				-	-	-	-	-	-	<0.0001	-	-	-	-	-
K323I	1	-	-	-	-	-	-	0					-	-	-	-	-	<0.0001	-	-	-	-	-
K323R	1	-	-	-	-	-	1	0					-	-	-	-	0	<0.0001	-	-	-	-	<0.0001
D324E	7		6	1	3	4	-	224					747	45	50	850	-	0.0013	0.0993	0.2896	0.3973	0.4214	-
D324F	-		-	-	-	-	1	-	-	-	-	-	-	-	-	-	0	-	-	-	-	-	<0.0001
L325I	-		-	-	-	2	-	-	-	-	-	-	-	-	-	22	-	-	-	-	-	0.0075	-
I326K	-		-	-	-	-	-	-					-	-	-	-	-	-	-	-	-	-	-
I326L	-	-	-	-	1	-	-	-					-	-	0	-	-	-	-	-	0.0328	-	-
I326V	11	-	-	-	1	1	8	497					-	-	245	40	1339	0.0021	-	-	<0.0001	0.2158	0.5382
E328D	1		1	2	-	-	-	0					82	0	-	-	-	<0.0001	0.7422	<0.0001	-	-	-
E328K	-		-	-	-	-	1	-					-	-	-	-	0	-	-	-	-	-	<0.0001
I329L	-		1	1	1	-	-	-					353	57	27	-	-	-	0.0438	0.1546	1	-	-
I329V	1		1	-	1	6	-	106					129	-	50	1041	-	0.6340	0.0004	-	1	1	-
G333D	-		-	1	-	-	-	-	-	-	-	-	-	0	-	-	-	-	-	0.0073	-	-	-
G333E	-		-	1	1	-	-	-	-	-	-	-	-	0	0	-	-	-	-	0.0073	0.0328	-	-
G333L	-		-	-	-	1	-	-	-	-	-	-	-	-	-	0	-	-	-	-	-	0.0058	-
Q334A	-		-	-	1	-	-	-					-	-	0	-	-	-	-	-	0.0328	-	-
Q334C	-		1	-	-	-	-	-					102	-	-	-	-	-	0.8627	-	-	-	-
Q334D	-		1	-	-	-	-	-					747	-	-	-	-	-	0.3954	-	-	-	-
Q334E	-		-	-	-	1	-	-	-	-	-	-	-	-	-	14	-	-	-	-	-	0.0842	-
Q334H	2		-	1	-	-	1	56					-	41	-	-	0	0.1664	-	0.2677	-	-	<0.0001
Q334K	-		1	-	-	-	-	-					0	-	-	-	-	-	<0.0001	-	-	-	-
Q334N	2		4	-	1	-	-	0					747	-	14	-	-	<0.0001	0.6893	-	0.3987	-	-
Q334R	-		-	-	1	-	-	-					-	-	0	-	-	-	-	-	0.0328	-	-
Q334Y	-		-	1	1	-	-	-					-	11	0	-	-	-	-	0.0840	0.0328	-	-
G335A	1	-	-	-	-	-	-	0				-	-	-	-	-	-	<0.0001	-	-	-	-	-
G335D	4		1	-	-	-	2	2704					5435	-	-	-	1951	<0.0001	<0.0001		-	-	<0.0001
G335L	-		1	-	-	-	-	-				-	0	-	-	-	-	-	<0.0001	-	-	-	-
G335E	1		-	-	-	-	-	2705				-	-	-	-	-	-	<0.0001	-	-	-	-	-
G335R	1		-	-	-	-	-	0				-	-	-	-	-	-	<0.0001	-	-	-	-	-
G335S	-		-	1	-	-	-	-	-	-	-	-	-	50	-	-	-	-	-	0.3161	-	-	-
*According to the Stanford HIV Drug Resistance Database; #Fisher exact test; Drug resistance mutations are in bold letters. Additional NRTI-selected mutations are in underline letters. Additional NNRTI polymorphic accessory mutations are in italic letters.
